# Supplementary material for: A high-throughput genetic screen identifies previously uncharacterized Borrelia burgdorferi genes important for resistance against reactive oxygen and nitrogen species
Source: PLOS journal article supplement (doi:10.1371/journal.ppat.1006225), 2017-02-17
Supplement: S1 (10.1371/journal.ppat.1006225.s001) [file journal.ppat.1006225.s001]

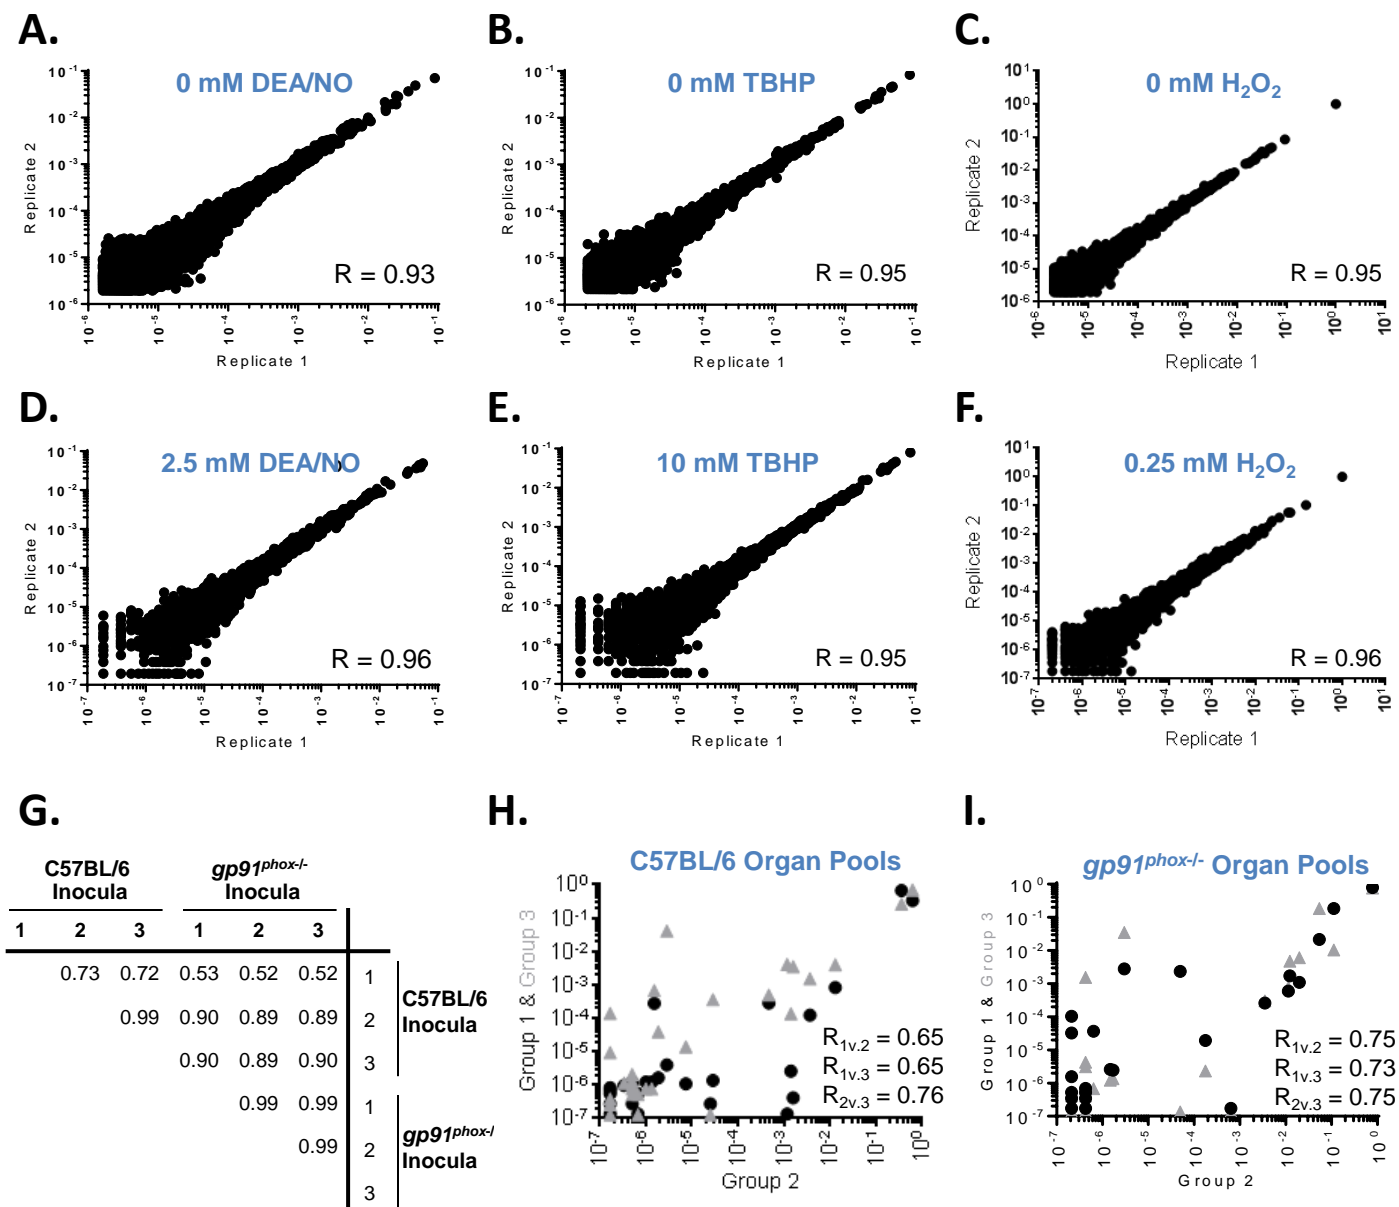

**S1 Fig. Correlation between biological replicates of the Tn-seq experiments.** The frequency of each mutant in the Tn library is shown for the two biological replicates of the untreated (A-C) and treated (D-F) samples. The nonparametric Spearman correlation coefficient  $R$  is shown in each case. Also shown are the nonparametric Spearman correlation coefficients comparing each of the 6 inocula used to infect 3 groups of C57BL/6 mice and 3 groups of *gp91<sup>phox</sup>-/-* mice with the mini-library of 39 Tn mutants (G). The frequency of each of these 39 Tn mutants in the three C57BL/6 and *gp91<sup>phox</sup>-/-* organ pools, along with the correlation coefficients between the samples, is also shown (H-I).
